# Supplementary material
Source: PubMed Central journal article supplement (PMC4682316)
Supplement: supp_tpc.15.00370_TPC2015-00370-RAR2_Supplemental_Data.pdf [file supp_tpc.15.00370_TPC2015-00370-RAR2_Supplemental_Data.pdf]

## Supplemental Figure 1

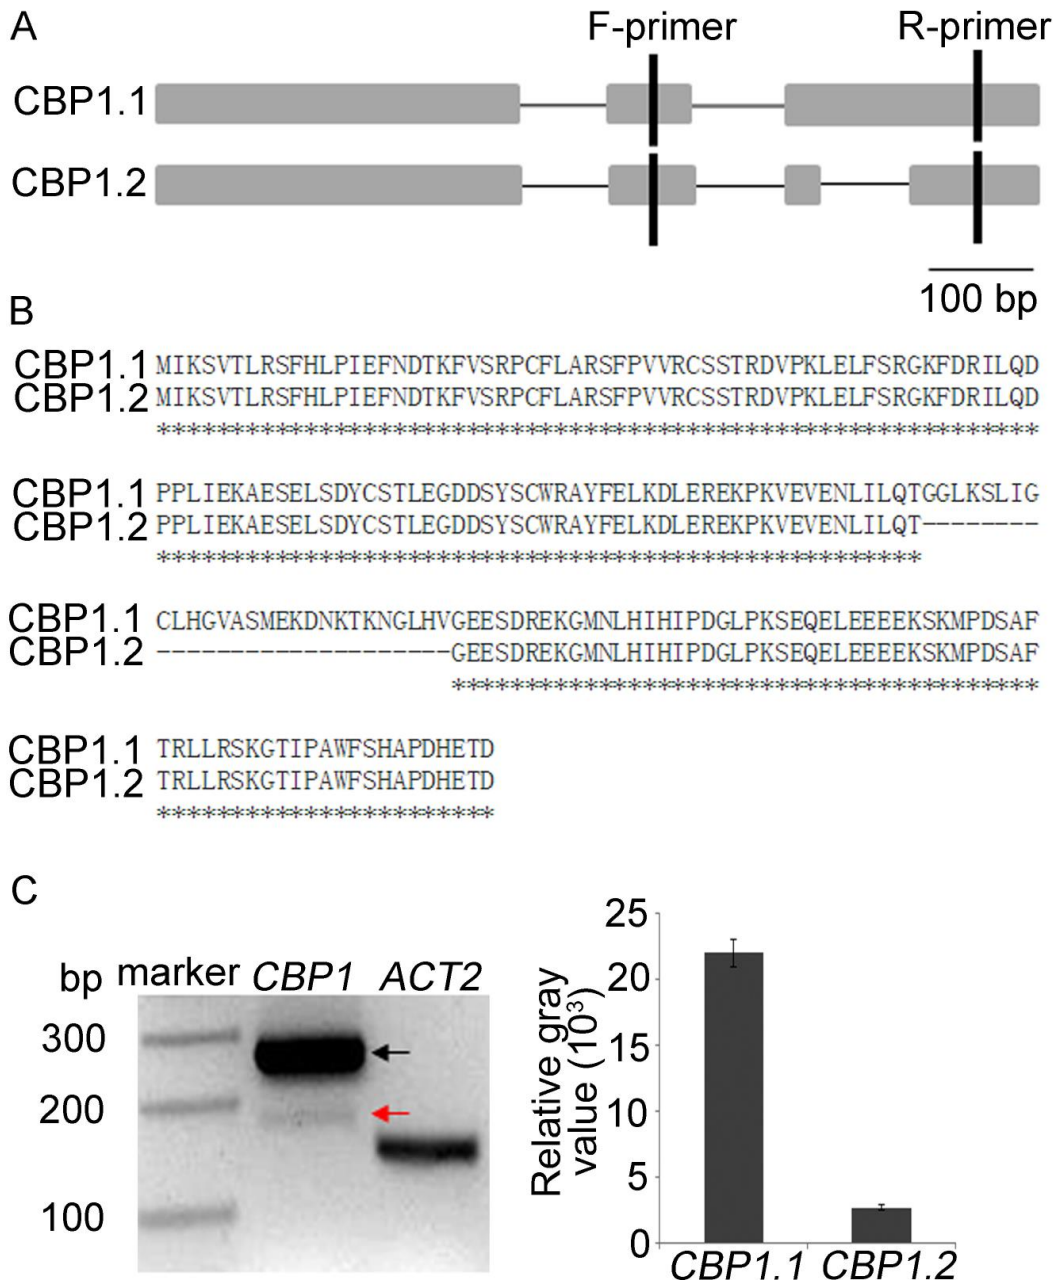

**Supplemental Figure 1. Two splicing forms of *CBP1*.** A. Schematic structure of *CBP1.1* and *CBP1.2*. *CBP1.2* contains an extra intron causing a 28 amino acid deletion relative to *CBP1.1*. Grey boxes indicate the exons and lines indicate the introns. B. Alignment of the full-length amino acid sequence of *CBP1.1* and *CBP1.2*. Asterisks indicate the same amino acids. C. RT-PCR result showing two splicing forms of *CBP1* amplified with the primers indicated in (A), the black arrow indicates *CBP1.1* and red arrow indicates *CBP1.2*; right panel indicates the relative quantity of the two *CBP1* transcripts in the left panel by quantifying the gray value.

## Supplemental Figure 2

```

AtCBP1 : -----MKKSVTRRSFHLPE-----IEFN-DTKFVSRPCFLARSFPVVRCSST---RVVPKLEDFEFS--RQKFDRIIQ-DFPLIERAEETLSDVCSNLEGGDSYSC : 86
AlCBP1 : -----MKKSVTRRSFHLPE-----IEFN-DTKFAAPSFPFARSFPVVRCSST---RVVPKLEDFEFS--RQKFDRIIQ-DFPLIERAEETLSDVCSNLEGGDSYSC : 86
BnCBP1 : -----MKKSVTRRPFPLP-----IEFHGKPFQVPEPS---KSCFAVVRCSST---RVVPKLEDFEFS--RQKFDRIIQ-DFPLIERAEETLSDVCSNLEGGDSYSC : 84
VvCBP1 : -----MKKSFARSSPS-----LIFDVRDS-----RSSTVCCSSRNSQPYIPKLEDFEFS--RQKLDRIVIR-DFPLIQRCENETMDVCSNLEGGDSYSC : 78
GmCBP1 : -----MKATLRPCSG-----PLILDTHSNRTSSSTRMRHASTVCCSSRN-QPYIPKLEDFEFS--RQKFDRAVK-DFPLIERSEKELIDVCSNLEGGDSYSC : 86
NtCBP1 : -----MVKCAVTNLSLSSLV--GANELQYSSKSSSSRFVINSSTIRCCSR-SHAYIPKLEDFEFS--RQKFDRAVK-DFPLIERSEKELIDVCSNLEGGDSYSC : 94
MtCBP1 : -----MNSTITLLR-----PSLFLHHTSSTTKLICS---SSSSRN-QSYIPKLEDFEFS--RQKLDRLAK-DFPLIERSEKELIDVCSNLEGGDSYSC : 82
ZmCBP1 : -----MSSSTLRP-PAPA-----PAPAHLTICSSPAAWRRAPA---VAVRAN-YDSIPKREFFSSRSILHEFLRQDKPLIQRTKDTHTDCTAIPGDECCSC : 89
SbCBP1 : -----MSSSTLRP-LVPAAVASPSPAHVACSSPAVGRVPA--VAVRAN-YDSIPKREFFSSRSILHEFLRQDKPLVQRTKDTHTDCTAIPGDECCSC : 96
OjCBP1 : -----MSSSTARPLAQPATATATATAFSASRTAAAGRRGSAAGVVAVRAN-YDSIPKREFFSSRSVLEDFLRQEKLVQRTKDTHTDCTAIPGDECCSC : 98
PpCBP1 : MALVGLLTPLASASLHATVPAQAQFQTACPNKLRLLMSPGCSGRAMATSMASEFVPHNSSNLVPRITCFEN--CSRISRLVR-EHSLLEAAEHALADRCHLLEGEAEFC : 109

```

VI

```

AtCBP1 : WRAYFEKIDLERKPKVVEVENLLQTCG--LKSILGCGHGVAENKDNKTKNGLHVGEESDREKGMNLHIH--IPDGLPKSEQEIDEEKSKMPDGAFTRLLRKCTIEAWFSH : 196
AlCBP1 : WRAYFEKIDLERKPKVVEVENLLQTCG--VNSLIGCGHGVAENKDNKTKNGLN-----REKGMNLHIH--IPDGLPKSEQEIDEEKSKMPDGAFTRLLRKCTIEAWFSH : 190
BnCBP1 : WRAYFEKIDLERKPKVVEVENLLQTCG--VNSLIGCGHGGLASNRESKTKNGSEVTEESDSRK-MRLHVV--VPDGLPKSEQEIDEEKSKMPDGAFTRLLRKCTIEAWFSH : 193
VvCBP1 : WRAYFEKIDLERKPKVVEVENLLQVCG--LKSILGCGHGVAATFSRGGKAGIGSVKAVNTEKEEGGRPF--VPDGLPKSEQEIDEEKSKMPDGAFTRLLRKCTIEAWFSH : 187
GmCBP1 : WRAYFEKIDLERKSPRADEERLLIEIGG--VNSLIGCGHGVAENKDNKTKNGLN--DMNLSKDVKSEEGRMCP--IPDGLPKSEQEIDEEKSKMPDGAFTRLLRKCTIEAWFSH : 193
NtCBP1 : WRAYFEKIDLERKSPRADEERLLIEIGG--VNSLIGCGHGVAENKDNKTKNGLN--DMNLSKDVKSEEGRMCP--IPDGLPKSEQEIDEEKSKMPDGAFTRLLRKCTIEAWFSH : 202
MtCBP1 : WRAYFEKIDLERKSPRADEERLLIEIGG--VNSLIGCGHGVAENKDNKTKNGLN--DMNLSKDVKSEEGRMCP--IPDGLPKSEQEIDEEKSKMPDGAFTRLLRKCTIEAWFSH : 189
ZmCBP1 : WRAYFEKIDLERKSPRADEERLLIEIGG--VNSLIGCGHGVAENKDNKTKNGLN--DMNLSKDVKSEEGRMCP--IPDGLPKSEQEIDEEKSKMPDGAFTRLLRKCTIEAWFSH : 201
SbCBP1 : WRAYFEKIDLERKSPRADEERLLIEIGG--VNSLIGCGHGVAENKDNKTKNGLN--DMNLSKDVKSEEGRMCP--IPDGLPKSEQEIDEEKSKMPDGAFTRLLRKCTIEAWFSH : 207
OjCBP1 : WRAYFEKIDLERKSPRADEERLLIEIGG--VNSLIGCGHGVAENKDNKTKNGLN--DMNLSKDVKSEEGRMCP--IPDGLPKSEQEIDEEKSKMPDGAFTRLLRKCTIEAWFSH : 209
PpCBP1 : WRAYFEKIDLERKSPRADEERLLIEIGG--VNSLIGCGHGVAENKDNKTKNGLN--DMNLSKDVKSEEGRMCP--IPDGLPKSEQEIDEEKSKMPDGAFTRLLRKCTIEAWFSH : 139

```

CI

VII

CII

```

AtCBP1 : APDHETD : 203
AlCBP1 : APDHETD : 197
BnCBP1 : APDHETD : 200
VvCBP1 : APDHETD : 194
GmCBP1 : APDHETD : 200
NtCBP1 : APDY--- : 206
MtCBP1 : APDHETD : 196
ZmCBP1 : RPDHETD : 208
SbCBP1 : RPDHETD : 214
OjCBP1 : RPDHETD : 216
PpCBP1 : ----- : -

```

**Supplemental Figure 2. Sequence alignment of CBP1 homologs from different species.** Black shading with letters and gray shading with white and black letters reflect 80, 60 and 40% sequence conservation, respectively. Two conserved domains were designated as C I and C II domain (indicated by red lines) and two highly variable regions were designated as V I and V II domain (indicated by blue lines). At, *Arabidopsis thaliana*; Al, *Arabidopsis lyrata*; Bn, *Brassica napus*; Vv, *Vitis vinifera*; Gm, *Glycine max*; Nt, *Nicotiana tomentosiformis*; Mt, *Medicago truncatula*; Zm, *Zea mays*; Sb, *Sorghum bicolor*; Oj, *Oryza sativa Japonica*; Pp, *Physcomitrella patens*.

## Supplemental Figure 3

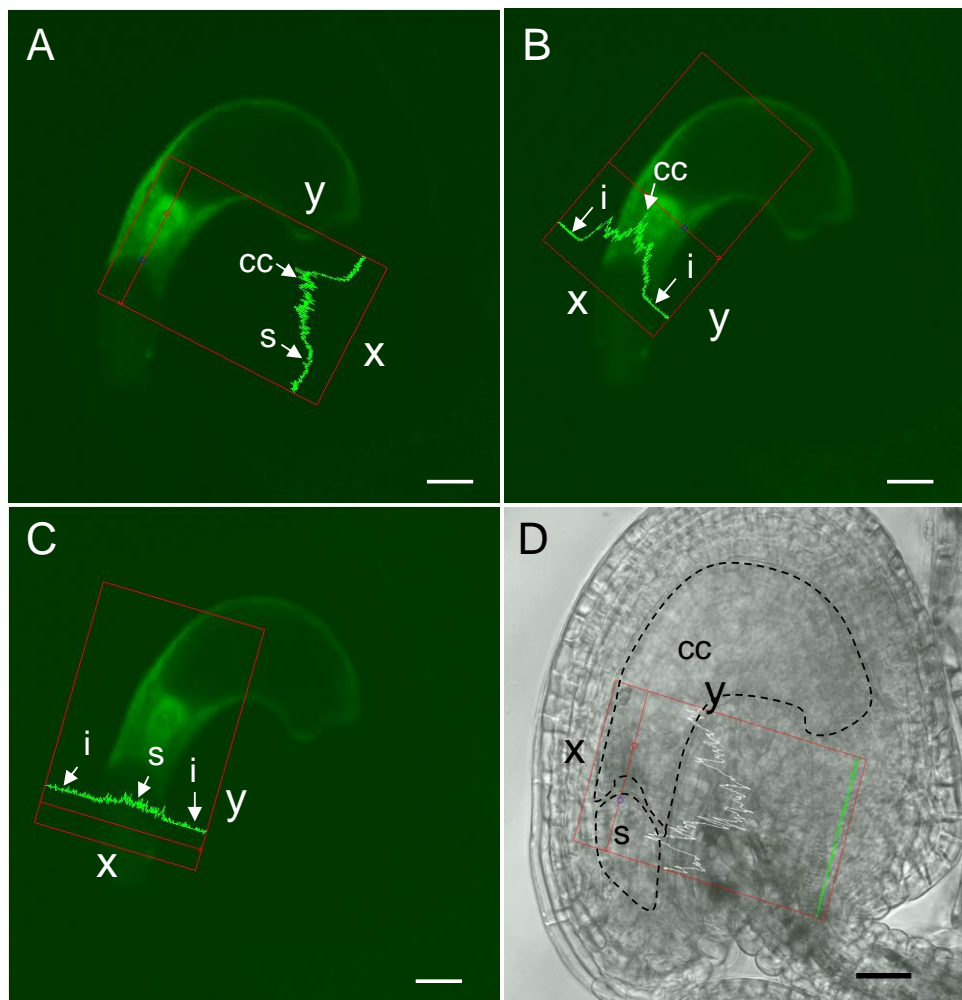

**Supplemental Figure 3. CBP1-3×GFP fluorescence is predominantly localized in the central cell.** (A-C). The same CLSM image of an ovule showing the fluorescence of CBP1-3×GFP under the native promoter. D. Ovules of the *amiRCBP1* knock-down plants in the background of *pCBP1:CBP1-3×GFP* exhibit no GFP signal. The fluorescence intensity was measured by Zeiss LSM image browser profiling tool (Version 4.2). The y-axes of the green lines are the relative pixel intensity of the GFP signal. The x-axes are the distance from the start point of the measurement in 2D dimension. cc, central cell; s, synergids; i, integument. Bar: 20  $\mu$ m.

## Supplemental Figure 4

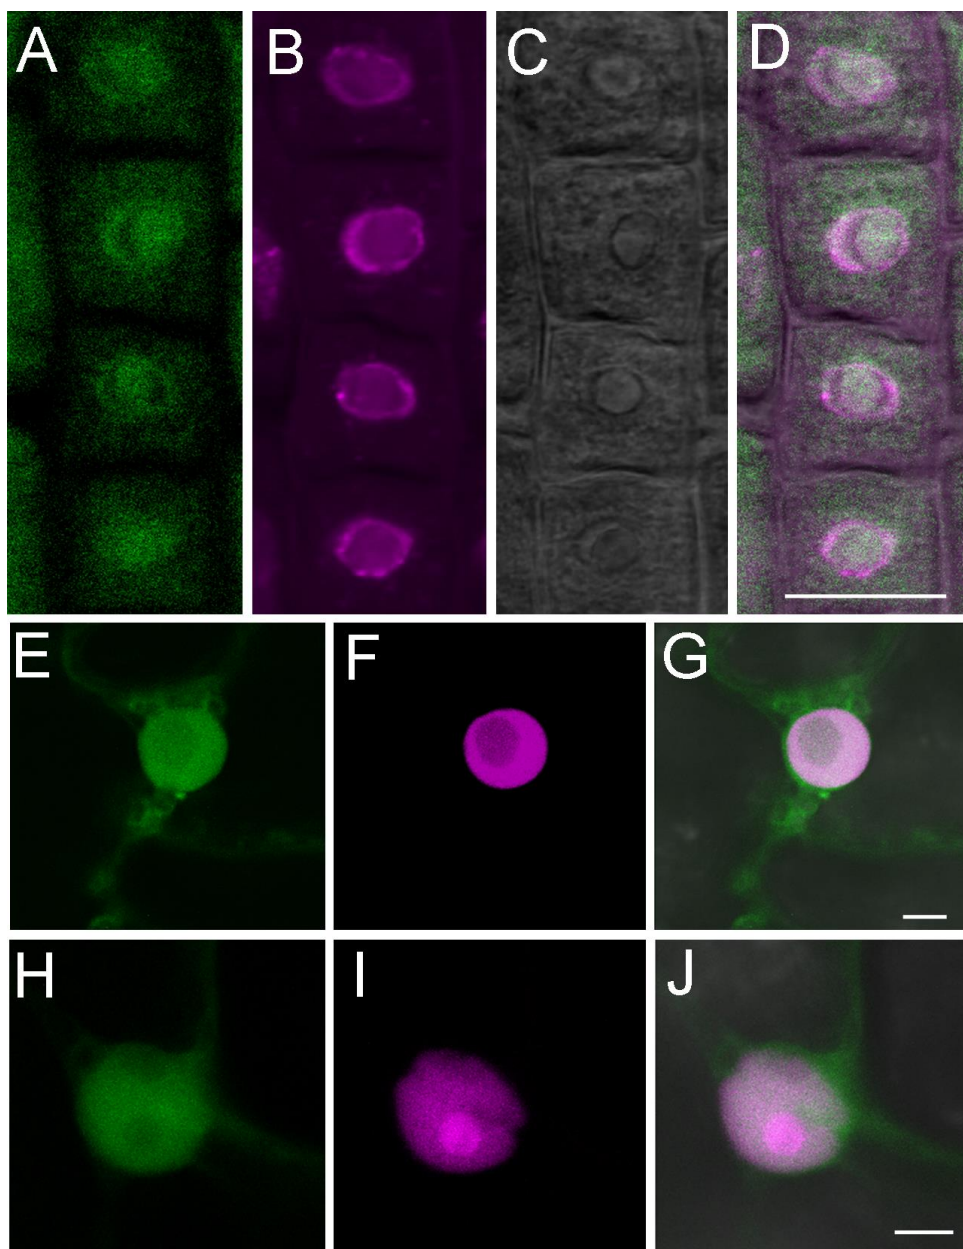

**Supplemental Figure 4. CBP1 localization in the nucleus and cytoplasm.** Subcellular localization analysis in *Arabidopsis* roots transformed with *pCBP1:CBP1-3×GFP* (A-D) and tobacco leaf epidermal cells transiently transformed with CBP1-GFP and the nucleus fluorescent marker H<sub>2</sub>B-mCherry (E-J). (A) Fluorescence of CBP1-3×GFP; (B) Fluorescence of DNA 49, 6-diamidino-2-phenylindole (DAPI) staining of the nucleus; (C) Image of bright field. (D) Merged images. (E) CBP1.1-GFP; (F, I) H<sub>2</sub>B-mCherry; (H) CBP1.2-GFP; (G, J) merged images of two channels. Bar: 5 μm.

## Supplemental Figure 5

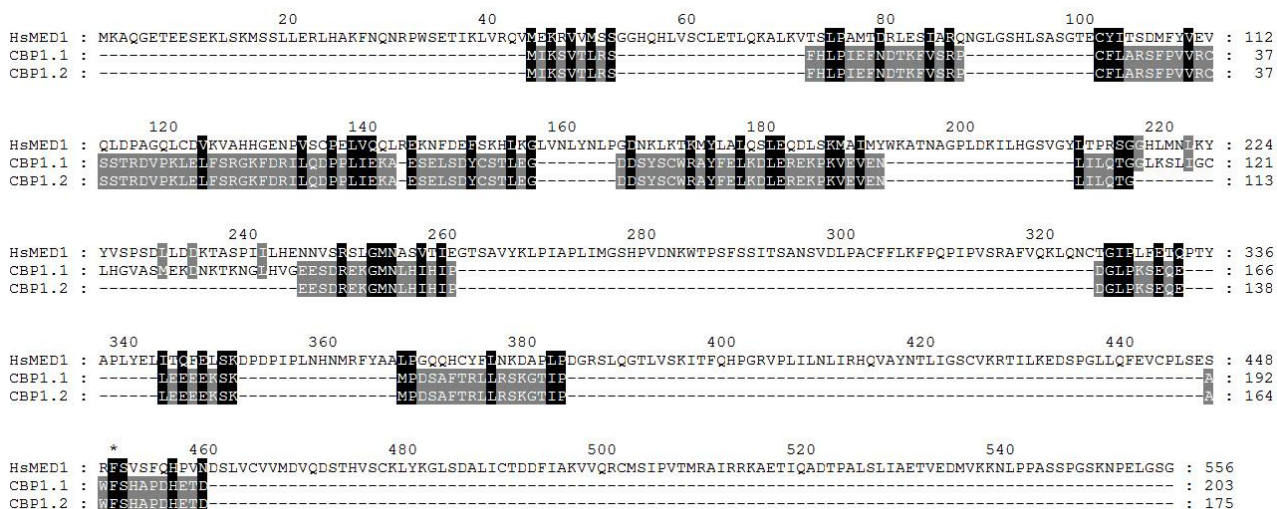

**Supplemental Figure 5. Protein alignment between MED1 from *Homo sapiens* and CBP1.** Black shading with letters and gray shading with white and black letters reflect 80, 60 and 40% sequence conservation, respectively.

## Supplemental Figure 6

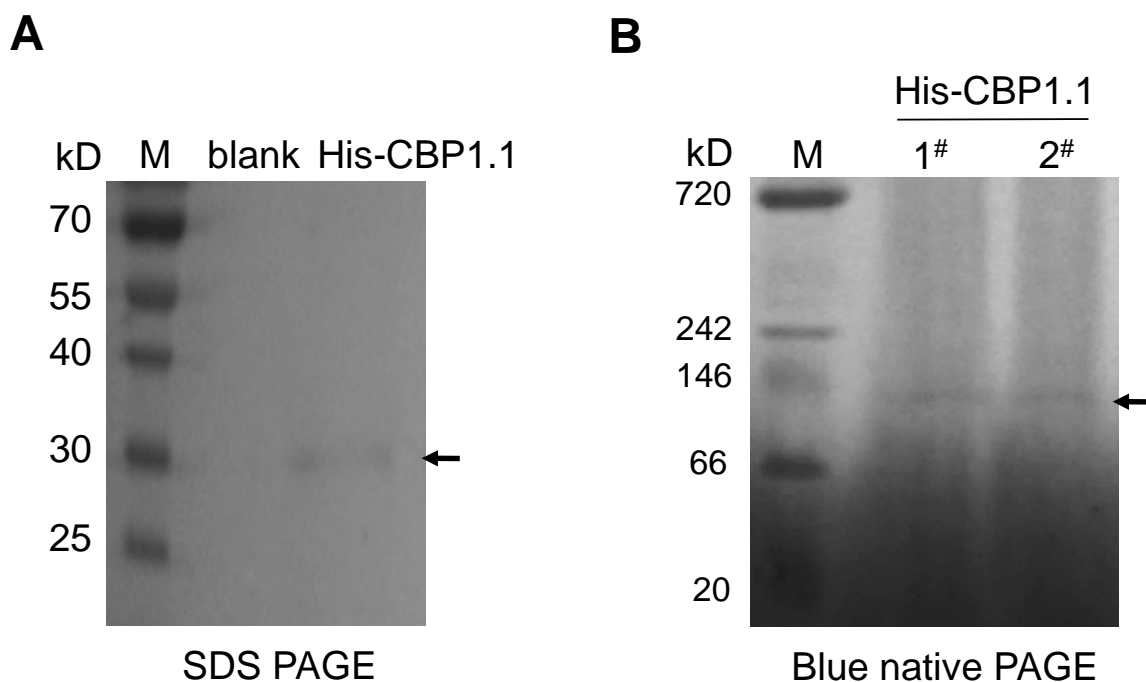

**Supplemental Figure 6. CBP1 forms a tetramer *in vitro*.** (A) SDS-PAGE separation of purified His-CBP1 with a predicted molecular weight of 29 kD. (B) Separation of purified His-CBP1 on the blue native gel showing a molecular weight of a tetramer. The loading amount in 2# is 1.5 fold of that in 1#. (A-B) Coomassie blue staining. Arrows indicate the target fusion proteins.

## Supplemental Figure 7

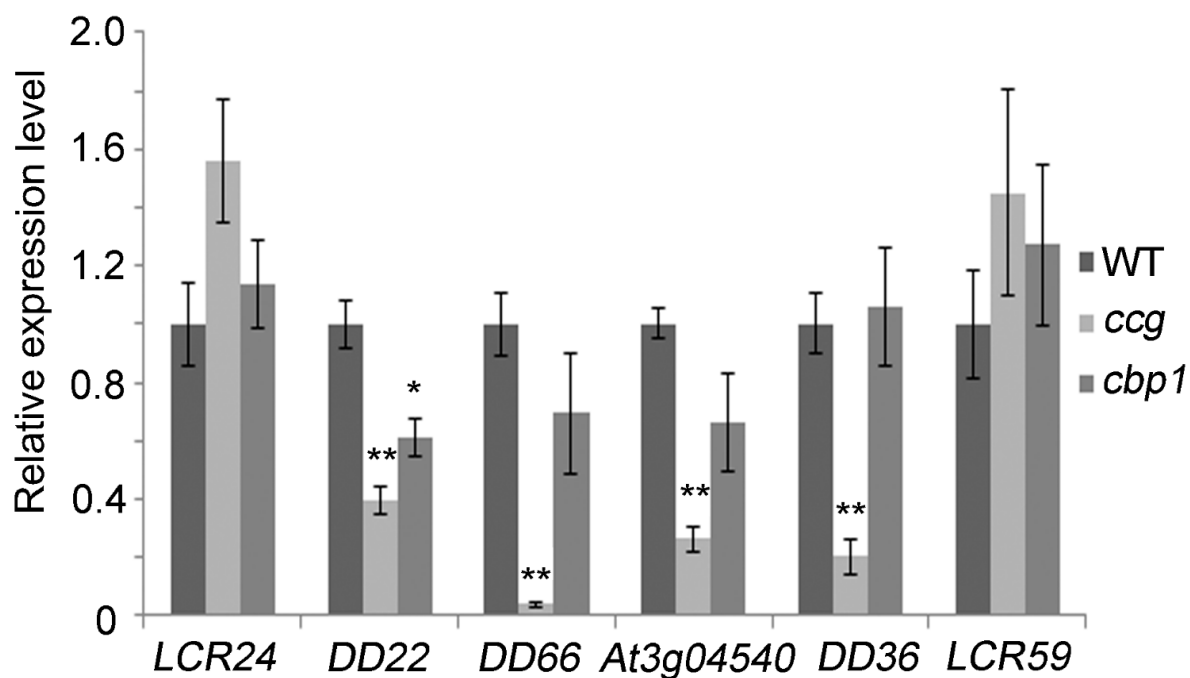

**Supplemental Figure 7. Central cell-expressed CRPs are down-regulated in *ccg* and *cbp1* ovules.** Relative expression level of CRP genes in *ccg* and *cbp1* ovules. Data are normalized to *eIF1 $\alpha$* . (n=3, mean  $\pm$  SD). Student's *t*-test, \*\*p<0.01, \*p<0.05.

## Supplemental Figure 8

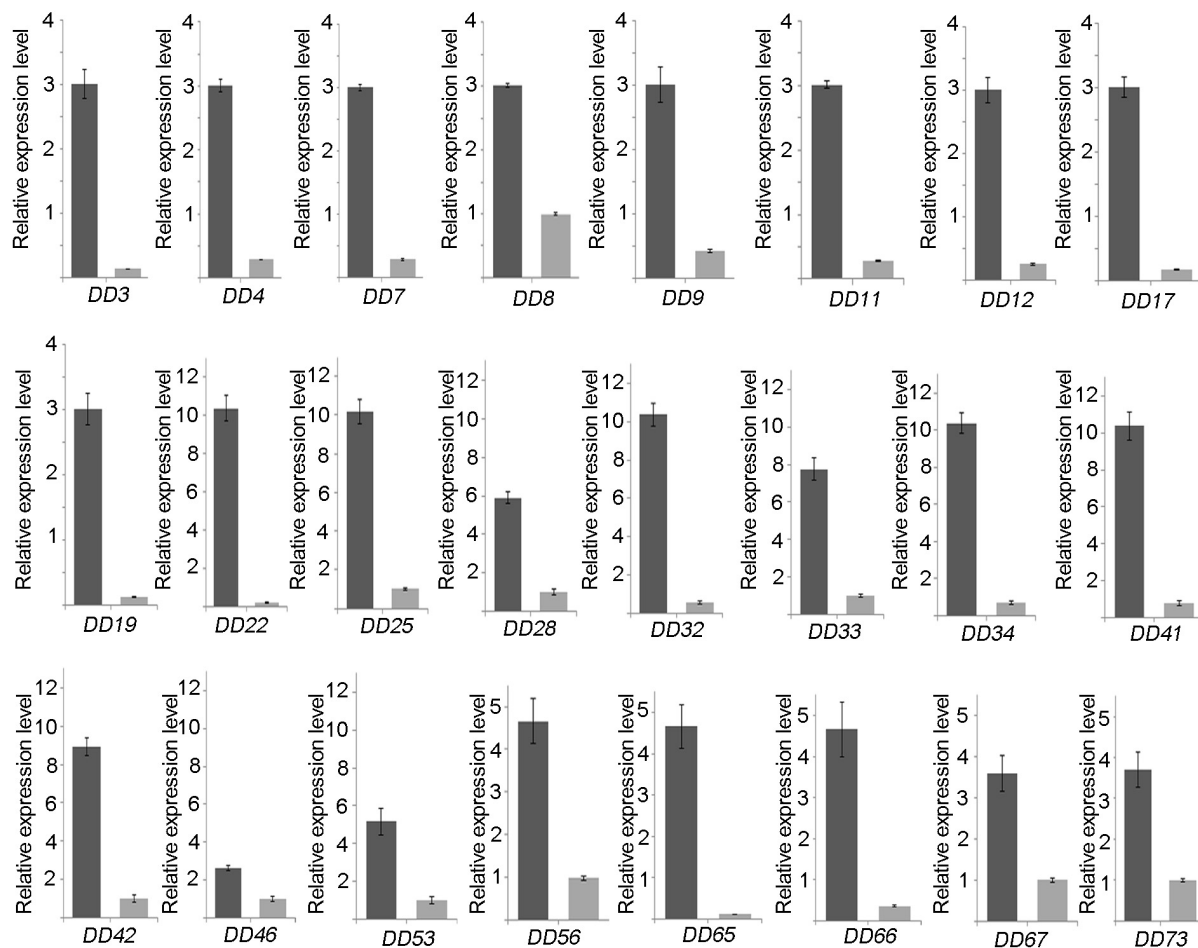

**Supplemental Figure 8. *MYB98* and the DD-type genes downstream of *MYB98* are down-regulated in *ccg* ovules.** Relative expression level (y-axis) of DD-type genes in *ccg* and wild-type ovules. Total RNA was isolated from mature ovules. Data were normalized to *eIF1 $\alpha$* . (n=3, means  $\pm$  SD).



## Supplemental Figure 9

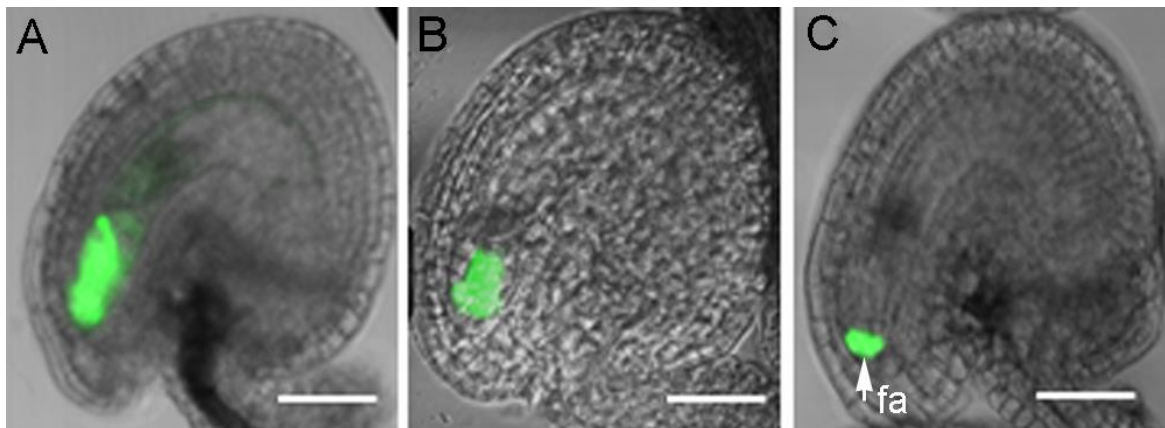

**Supplemental Figure 9. *CRP810.2* genes are expressed in the synergid cells.** (A) *ProCRP810.2.1:GFP*; (B) *ProCRP810.2.2:GFP*; (C) *ProCRP810.2.3:CRP810.2.3-GFP*. fa: filiform apparatus. Scale bar: 20  $\mu$ m.

**Table S1. Genetic complementation data of *ccg* by expression of *CCG* under the *CBP1* promoter**

| Transgenic plants | The ovule abortion ratio of transgenic plants | Kan <sup>R</sup> /Kan <sup>S</sup> (T2) |
|-------------------|-----------------------------------------------|-----------------------------------------|
| 1                 | 13.4% (n= 216)                                | 1.97 (n=214)                            |
| 2                 | 17% (n= 314)                                  | 2.37 (n=662)                            |
| 3                 | 15.8% (n=203)                                 | 1.68 (n=451)                            |

For all the above scores, Students *t*-test,  $p < 0.01$ .
